# Supplementary material for: CA-170 – A Potent Small-Molecule PD-L1 Inhibitor or Not?
Source: MDPI journal article supplement (doi:10.3390/molecules24152804), 2019-08-01
Supplement: s1 [file s1]

**Supplementary Materials: CA-170 – a potent small-molecule PD-L1 inhibitor or not?**

**Bogdan Musielak, Justyna Kocik, Lukasz Skalniak, Katarzyna Magiera-Mularz, Dominik Sala, Mirosława Czub, Małgorzata Stec, Maciej Siedlar, Tad A. Holak and Jacek Plewka\***

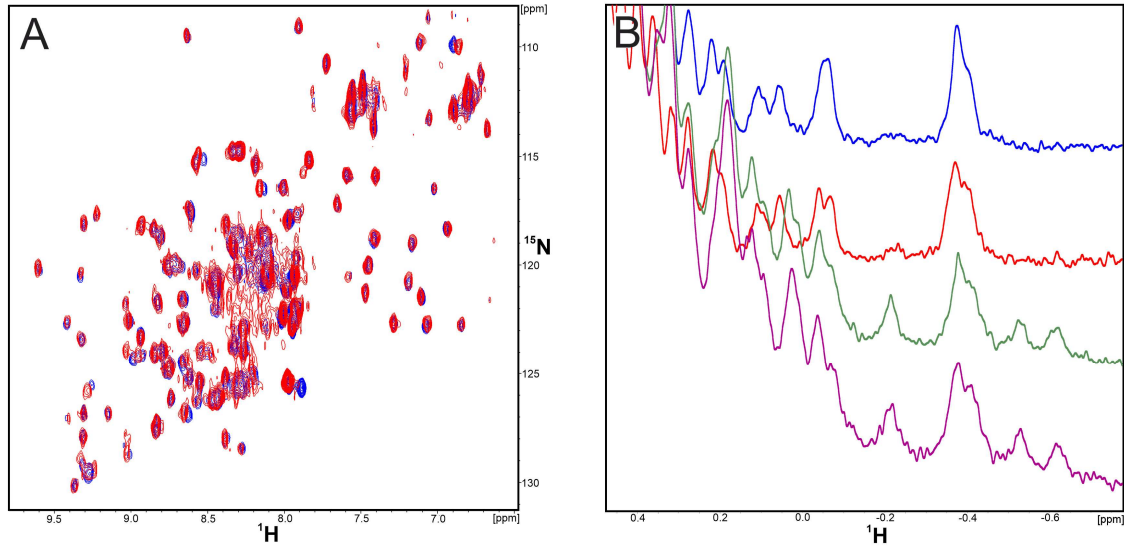

**Figure S1. A)**  $^1\text{H}$ - $^{15}\text{N}$  HMQC spectra of apo-hPD-L1 (18-134) (blue) and hPD-L1 (18-134) with AUNP-12 (red) in the molar ratio 1/5. **B)**  $^1\text{H}$  NMR spectra of apo-hPD-L1 (18-134) (blue), hPD-L1 (18-134) with AUNP-12 (red) in the molar ratio 1/5, apo-hPD-L1 (18-239) (purple), and hPD-L1 (18-239) with AUNP-12 (green) in the molar ratio 1/5.

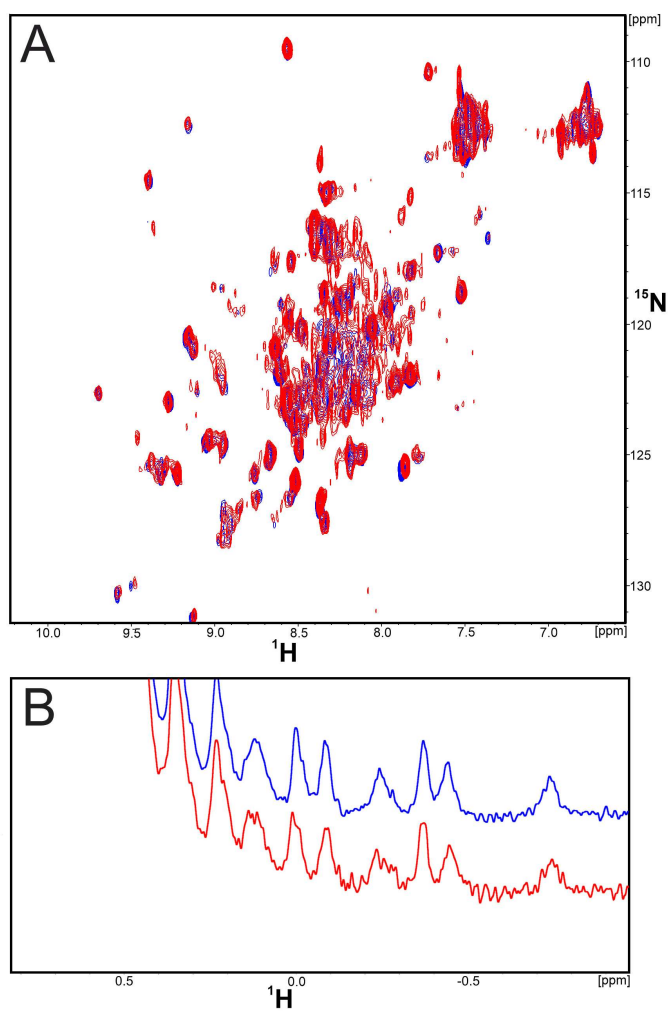

**Figure S2.** **A)**  $^1\text{H}$ - $^{15}\text{N}$  HMQC spectra of apo-hPD-1 (blue) and hPD-1 with **AUNP-12** (red) in the molar ratio 1/5. **B)**  $^1\text{H}$  NMR spectra of apo- hPD-1 (blue), hPD-1 with **AUNP-12** (red) in the molar ratio 1/5.

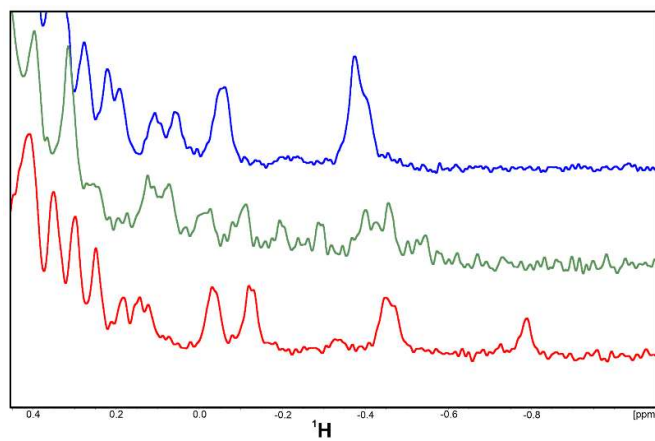

**Figure S3.**  $^1\text{H}$  NMR spectra of apo-hPD-L1 (18-134) (blue) and with **BMS-1166** compound (green) and **peptide-57** (red) in the molar ratio 1/1, respectively.
